# Supplementary material for: Gibberellic Acid Signaling Is Required to Induce Flowering of Chrysanthemum Grown under Both Short and Long Days
Source: Preprints.org preprint supplement (doi:10.20944/preprints201706.0015.v1), 2017-06-02
Supplement: Supplementary file 1 [file supplementary]

## Sheet: MYB
	List of difference expression MYB family (> 2 fold or < 0.5, p<0.001) in WT-SD /WT-LD chrysanthemum plants
	unigene	WT-SD /WT-LD				Nr Annotation
		WT-SD	WT-LD	ratio	P-value	description
	CL897.Contig4_All	0.5003	0.052	9.62115	8.50214e-05	MYB transcription factor [Camellia sinensis]
	Unigene2122_All	21.0682	6.3949	3.29453	1.6812e-75	PREDICTED: transcription factor MYB59-like [Vitis vinifera]
	Unigene39827_All	3.1695	0.5882	5.38847	3.65158e-14	PREDICTED: transcription factor MYB75-like [Vitis vinifera]
	CL4324.Contig1_All	4.6377	0.3433	13.5092	8.13738e-13	PREDICTED: transcription factor MYB59-like [Vitis vinifera]
	CL10138.Contig2_All	1.2649	0.1315	9.61901	8.50214e-05	PREDICTED: transcription factor MYB59-like [Vitis vinifera]
	CL9908.Contig3_All	1.3899	0.6442	2.15756	7.39666e-06	MYB-like DNA-binding protein [Catharanthus roseus]
	Unigene1626_All	16.8572	4.9234	3.42389	7.07306e-15	PREDICTED: transcription factor MYB28-like, partial [Solanum lycopersicum]
	Unigene12681_All	21.0682	6.3949	3.29453	1.6812e-75	PREDICTED: transcription factor MYB59-like [Vitis vinifera]
	CL5312.Contig2_All	2.6261	0	0	9.28438e-09	MYB2 [Chrysanthemum x morifolium]
	Unigene45180_All	1.8665	0	0	1.62678e-06	MYB-related protein [Lotus japonicus]
	Unigene38746_All	4.8071	0.3463	0.0720393	4.1544e-21	MYB2 [Chrysanthemum x morifolium]
	Unigene17629_All	2.3789	0.2179	0.091597	2.78432e-05	PREDICTED: myb-related protein Zm38-like [Cucumis sativus]
	Unigene43294_All	4.9717	0.4758	0.0957017	7.3961e-15	PREDICTED: myb-related protein 306 isoform 1 [Vitis vinifera]
	CL7700.Contig2_All	2.74	0.3861	0.140912	1.18567e-05	MYB1 protein [Gerbera hybrid cultivar]
	Unigene29197_All	2.4215	0.3697	0.152674	3.96808e-07	PREDICTED: transcription repressor MYB4-like [Solanum lycopersicum]
	Unigene8384_All	2.9663	0.5055	0.170414	7.78016e-08	PREDICTED: myb family transcription factor APL-like [Solanum lycopersicum]
	Unigene9085_All	8.862	2.3836	0.268969	1.3034e-27	MYB9A protein [Gerbera hybrid cultivar]
	CL10078.Contig2_All	4.35	1.4942	0.343494	3.824e-10	MYB9A protein [Gerbera hybrid cultivar]
	Unigene19056_All	10.4977	4.1772	0.397916	3.57652e-24	transcription factor DcMYB2 [Daucus carota]
	CL10078.Contig1_All	6.0313	2.6342	0.436755	2.16304e-09	MYB9A protein [Gerbera hybrid cultivar]
	Unigene7748_All	11.5011	5.1934	0.451557	1.61667e-22	MYB6 [Malus x domestica]
	Unigene19649_All	24.9635	11.3513	0.454716	6.67332e-49	MYB2 [Chrysanthemum x morifolium]
	Unigene24264_All	2.2834	1.0593	0.463913	5.9543e-05	Myb-like protein P [Saussurea medusa]
	Unigene750_All	3.276	1.6367	0.499603	3.5217e-06	PREDICTED: myb-related protein 3R-1-like [Glycine max]
	List of difference expression MYB family (> 2 fold or < 0.5, p<0.001) in M-SD /M-LD chrysanthemum plants
	unigene	M-SD /M-LD				Nr Annotation
		M-SD	M-LD	ratio	P-value	description
	Unigene29981_All	3.5745	0.131	27.2863	1.46e-14	predicted protein [Populus trichocarpa]
	CL10138.Contig1_All	1.4806	0.071	20.8535	6.19e-06	PREDICTED: myb-related protein 305-like [Fragaria vesca subsp. vesca]
	CL4324.Contig2_All	2.3897	0.2189	10.9169	2.1e-05	PREDICTED: transcription factor MYB48-like [Glycine max]
	Unigene12681_All	27.7388	3.0731	9.02633	1.87e-206	PREDICTED: transcription factor MYB28-like, partial [Solanum lycopersicum]
	Unigene39827_All	6.4769	0.7288	8.88707	2.65e-36	PREDICTED: transcription factor MYB75-like [Vitis vinifera]
	CL4324.Contig1_All	6.7679	0.9037	7.4891	5.95e-15	PREDICTED: transcription factor MYB48-like [Glycine max]
	CL469.Contig7_All	4.3004	0.7109	6.04923	5.63e-20	PREDICTED: transcription factor MYB59-like [Vitis vinifera]
	CL10138.Contig2_All	1.8744	0.3777	4.96267	4.54e-05	PREDICTED: myb-related protein 305-like [Fragaria vesca subsp. vesca]
	Unigene30298_All	1.624	0.3506	4.63206	4.44e-08	PREDICTED: transcription factor MYB59-like [Vitis vinifera]
	CL3505.Contig2_All	4.3229	0.9679	4.46627	1.72e-05	R2R3-MYB transcription factor MYB6 [Epimedium sagittatum]
	CL469.Contig4_All	2.9517	0.6848	4.31031	1.33e-18	PREDICTED: transcription factor MYB59-like [Cucumis sativus]
	CL7523.Contig3_All	3.6345	0.9411	3.86197	1.06e-19	PREDICTED: myb-related protein 306 [Vitis vinifera]
	CL897.Contig3_All	1.5011	0.3936	3.81377	9.51e-09	MYB transcription factor [Camellia sinensis]
	Unigene7743_All	34.0525	9.2122	3.69646	8.64e-139	MYB1 [Chrysanthemum x morifolium]
	CL897.Contig4_All	1.5074	0.498	3.02691	4.36e-06	MYB transcription factor [Catharanthus roseus]
	CL469.Contig5_All	1.9682	0.7082	2.77916	3.53e-07	PREDICTED: transcription factor MYB59-like [Vitis vinifera]
	Unigene2122_All	25.4937	9.3556	2.72497	4.14e-63	PREDICTED: transcription factor MYB59-like [Vitis vinifera]
	CL4900.Contig3_All	0.7513	0.2951	2.54592	6.89e-05	MYB-like DNA-binding protein [Catharanthus roseus]
	Unigene33281_All	12.541	5.0852	2.46618	4.68e-06	PREDICTED: transcription factor MYB48-like [Solanum lycopersicum]
	Unigene19503_All	47.2359	19.7287	2.39427	2.34e-89	ATMYB6 [Arabidopsis lyrata subsp. lyrata]
	Unigene31255_All	4.412	1.9629	2.24769	7.62e-09	PREDICTED: transcription factor MYB39 [Vitis vinifera]
	CL9206.Contig1_All	3.0403	1.3615	2.23305	9.15e-05	PREDICTED: transcription factor MYB46-like [Vitis vinifera]
	Unigene35243_All	3.988	1.8082	2.20551	5.74e-07	putative MYB DNA-binding domain superfamily protein [Zea mays]
	CL9605.Contig1_All	0	0.4157	0	3.55e-06	PREDICTED: transcription factor MYB1R1 [Vitis vinifera]
	Unigene24264_All	0.1691	19.7025	0.00858267	2.3e-198	Myb-like protein P [Saussurea medusa]
	Unigene7748_All	2.5277	81.4719	0.0310254	0	MYB6 [Malus x domestica]
	Unigene38746_All	0.2053	3.1542	0.0650878	1.67e-14	MYB2 [Chrysanthemum x morifolium]
	Unigene2782_All	0.7262	8.414	0.0863085	4.95e-15	MYB2 [Chrysanthemum x morifolium]
	Unigene11644_All	0.644	6.6186	0.0973015	1.85e-30	PREDICTED: transcriptional activator Myb-like [Solanum lycopersicum]
	Unigene15592_All	2.9665	29.0025	0.102284	3.38e-165	PREDICTED: myb-related protein Myb4 [Vitis vinifera]
	Unigene43294_All	0.141	1.3497	0.104468	0.000113082	PREDICTED: myb-related protein 306 isoform 1 [Vitis vinifera]
	CL5312.Contig2_All	0.1996	1.8101	0.11027	0.000207348	MYB2 [Chrysanthemum x morifolium]
	Unigene2194_All	17.194	133.984	0.128329	0	MYB2 [Chrysanthemum x morifolium]
	Unigene38745_All	1.002	6.017	0.166528	3.95e-23	PREDICTED: transcription factor MYB44-like [Solanum lycopersicum]
	Unigene9085_All	0.2673	1.3803	0.193654	1.02e-06	MYB9A protein [Gerbera hybrid cultivar]
	CL10078.Contig2_All	0.2952	1.227	0.240587	6.22e-05	MYB9A protein [Gerbera hybrid cultivar]
	Unigene19649_All	13.995	46.5327	0.300756	1.05e-167	MYB2 [Chrysanthemum x morifolium]
	Unigene8384_All	1.2454	3.7643	0.330845	8.41e-06	PREDICTED: myb family transcription factor APL-like [Solanum lycopersicum]
	Unigene40440_All	11.4125	31.5359	0.361889	1.68e-89	PREDICTED: myb-related protein 306 isoform 1 [Vitis vinifera]
	List of difference expression MYB family (> 2 foldor < 0.5, p<0.001) in M-SD /WT-SD chrysanthemum plants
	unigene	M-SD /WT-SD				Nr Annotation
		M-SD	WT-SD	ratio	P-value	description
	CL897.Contig3_All	1.5011	0.2379	6.30979	1.47406e-12	MYB transcription factor [Camellia sinensis]
	CL897.Contig4_All	1.5074	0.5003	3.01299	3.4341e-06	MYB transcription factor [Catharanthus roseus]
	Unigene2122_All	25.4937	9.9046	2.57393	2.38986e-59	PREDICTED: transcription factor MYB59-like [Vitis vinifera]
	CL7523.Contig3_All	3.6345	1.6833	2.15915	1.38376e-09	PREDICTED: myb-related protein 306 [Vitis vinifera]
	Unigene39827_All	6.4769	3.1695	2.04351	2.1909e-09	PREDICTED: transcription factor MYB75-like [Vitis vinifera]
	Unigene9085_All	0.2673	2.3836	0.112141	3.07702e-14	MYB9A protein [Gerbera hybrid cultivar]
	CL10078.Contig1_All	0.3416	2.6342	0.129679	4.4103e-13	MYB9A protein [Gerbera hybrid cultivar]
	Unigene24264_All	0.1691	1.0593	0.159634	5.77608e-07	Myb-like protein P [Saussurea medusa]
	CL10078.Contig2_All	0.2952	1.4942	0.197564	1.3032e-06	MYB9A protein [Gerbera hybrid cultivar]
	Unigene35243_All	3.988	11.8858	0.335526	4.61594e-29	putative MYB DNA-binding domain superfamily protein [Zea mays]
	Unigene7748_All	2.5277	5.1934	0.486714	1.05037e-09	MYB6 [Malus x domestica]
	List of difference expression MYB family (> 2 foldor < 0.5, p<0.001) in M-LD /WT-LD chrysanthemum plants
	unigene	M-LD /WT-LD				Nr Annotation
		M-LD	WT-LD	ratio	P-value	description
	CL897.Contig4_All	0.052	0.498	9.57692	9.97866e-05	MYB transcription factor [Catharanthus roseus]
	Unigene24264_All	2.2834	19.7025	8.62858	1.62772e-119	Myb-like protein P [Saussurea medusa]
	Unigene7748_All	11.5011	81.4719	7.08384	0	MYB6 [Malus x domestica]
	Unigene38745_All	0.928	6.017	6.48384	2.04446e-23	PREDICTED: transcription factor MYB44-like [Solanum lycopersicum]
	Unigene2194_All	28.0579	133.984	4.77526	0	MYB2 [Chrysanthemum x morifolium]
	Unigene2782_All	2.1654	8.414	3.88566	2.63222e-08	MYB2 [Chrysanthemum x morifolium]
	Unigene15592_All	8.1656	29.0025	3.55179	9.02516e-82	PREDICTED: myb-related protein Myb4 [Vitis vinifera]
	Unigene23071_All	9.2704	31.24	3.36987	1.4442e-271	MYB2 [Chrysanthemum x morifolium]
	CL12917.Contig1_All	0.4277	1.3161	3.07716	8.51066e-05	MYB transcription factor [Camellia sinensis]
	Unigene11644_All	2.4853	6.6186	2.6631	4.0535e-11	PREDICTED: transcriptional activator Myb-like [Solanum lycopersicum]
	Unigene2122_All	3.8165	9.3556	2.45136	3.9992e-20	PREDICTED: transcription factor MYB59-like [Vitis vinifera]
	Unigene28715_All	1.2278	2.6049	2.1216	8.8745e-05	PREDICTED: transcription factor MYB59-like [Vitis vinifera]
	Unigene9085_All	8.862	1.3803	0.155755	1.73787e-40	MYB9A protein [Gerbera hybrid cultivar]
	CL10078.Contig1_All	6.0313	1.1472	0.190208	5.11118e-22	MYB9A protein [Gerbera hybrid cultivar]
	Unigene43294_All	4.9717	1.3497	0.271477	4.09524e-08	PREDICTED: myb-related protein 306 isoform 1 [Vitis vinifera]
	CL10078.Contig2_All	4.35	1.227	0.282069	3.15932e-12	MYB9A protein [Gerbera hybrid cultivar]
	CL14329.Contig5_All	2.4976	0.8093	0.324031	1.06007e-06	PREDICTED: transcription factor MYB46-like [Vitis vinifera]
	CL7523.Contig3_All	2.7567	0.9411	0.341386	2.66922e-11	PREDICTED: myb-related protein 306 [Vitis vinifera]
	CL469.Contig7_All	2.0155	0.7109	0.352716	1.61317e-05	PREDICTED: transcription factor MYB59-like [Vitis vinifera]
	CL9206.Contig1_All	3.422	1.3615	0.397867	4.7193e-06	PREDICTED: transcription factor MYB46-like [Vitis vinifera]
	Unigene19056_All	10.4977	4.613	0.43943	5.1622e-20	transcription factor DcMYB2 [Daucus carota]
	Unigene12681_All	6.3949	3.0731	0.480555	4.00436e-12	PREDICTED: transcription factor MYB28-like, partial [Solanum lycopersicum]

## Sheet: MADS
	List of difference expression MADS family (> 2 fold or < 0.5, p<0.001) in WT-SD /WT-LD chrysanthemum plants
	unigene	WT-SD /WT-LD				Nr Annotation
		WT-SD	WT-LD	ratio	P-value	description
	Unigene23898_All	47.8668	1.5379	31.1248	0	APETALA1 and FRUITFULL like protein [Chrysanthemum seticuspe f. boreale]
	CL1464.Contig1_All	12.6733	2.0443	6.19933	1.80465e-66	MADS domain protein [Gerbera hybrid cultivar]
	CL1464.Contig2_All	2.2009	0.7784	2.82747	3.88236e-06	MADS domain protein [Gerbera hybrid cultivar]
	Unigene7813_All	6.1718	3.0151	2.04696	3.8879e-11	MADS-box transcription factor CDM41 [Chrysanthemum x morifolium]
	Unigene20776_All	42.0845	308.771	0.136297	0	SVP3 [Actinidia chinensis]
	CL13709.Contig1_All	1.7216	5.0533	0.340688	2.40716e-14	MADS-box transcription factor MPP2 [Physalis peruviana]
	CL3392.Contig2_All	3.1211	7.7786	0.401242	2.57602e-15	MADS-box domain protein [Camellia sinensis]
	CL3392.Contig4_All	1.4286	3.2644	0.43763	4.11714e-06	MADS-box domain protein [Camellia sinensis]
	Unigene860_All	1.2819	2.799	0.457985	0.000132462	PREDICTED: agamous-like MADS-box protein AGL80-like [Solanum lycopersicum]
	CL5747.Contig2_All	2.3181	4.7164	0.491498	3.63458e-08	AP1-like protein [Chrysanthemum lavandulifolium]
	List of difference expression MADS family (> 2 fold or < 0.5, p<0.001) in M-SD /M-LD chrysanthemum plants
	unigene	M-SD /M-LD				Nr Annotation
		M-SD	M-LD	ratio	P-value	description
	Unigene55133_All	2.4767	0	#DIV/0!	8.16e-06	APETALA1 like protein [Chrysanthemum seticuspe f. boreale]
	Unigene23898_All	76.8383	2.0278	37.8924	0	APETALA1 and FRUITFULL like protein [Chrysanthemum seticuspe f. boreale]
	CL1464.Contig1_All	17.0876	5.0771	3.36562	1.07e-54	MADS domain protein [Gerbera hybrid cultivar]
	CL7726.Contig2_All	3.4886	1.2876	2.70938	4.13e-08	MADS-box transcriptional factor HAM59 [Helianthus annuus]
	CL1464.Contig2_All	4.0838	1.8467	2.2114	2.49e-07	MADS domain protein [Gerbera hybrid cultivar]
	Unigene20776_All	23.4965	167.496	0.140281	0	SVP3 [Actinidia chinensis]
	CL3392.Contig2_All	4.3822	8.8307	0.496246	9.58e-12	MADS-box domain protein [Camellia sinensis]
	List of difference expression MADS family (> 2 foldor < 0.5, p<0.001) in M-SD /WT-SD chrysanthemum plants
	unigene	M-SD /WT-SD				Nr Annotation
		M-SD	WT-SD	ratio	P-value	description
	Unigene13291_All	2.9166	0.4499	6.48277	4.05046e-09	PREDICTED: MADS-box transcription factor 27-like [Fragaria vesca subsp. vesca]
	CL3392.Contig7_All	2.8725	0.9053	3.17298	3.3029e-10	MADS-box domain protein [Camellia sinensis]
	CL14613.Contig14_All	2.9552	1.0075	2.9332	1.17937e-07	FLC-like, partial [Cichorium intybus]
	CL3392.Contig4_All	2.8949	1.4286	2.02639	0.000113524	MADS-box domain protein [Camellia sinensis]
	List of difference expression MADS family (> 2 foldor < 0.5, p<0.001) in M-LD /WT-LD chrysanthemum plants
	unigene	M-LD /WT-LD				Nr Annotation
		M-LD	WT-LD	ratio	P-value	description
	CL1464.Contig1_All	5.0771	2.0443	2.48354	1.45233e-11	MADS domain protein [Gerbera hybrid cultivar]
	CL3392.Contig7_All	2.922	1.3372	2.18516	4.6297e-06	MADS-box domain protein [Camellia sinensis]
	CL6581.Contig1_All	0.7234	2.1294	0.33972	3.85458e-06	PREDICTED: MADS-box transcription factor 3 [Vitis vinifera]

## Sheet: AP2-ERF
	List of difference expression AP2/ERF family (> 2 fold or < 0.5, p<0.001) in WT-SD /WT-LD chrysanthemum plants
	unigene	WT-SD /WT-LD				Nr Annotation
		WT-SD	WT-LD	ratio	P-value	description
	Unigene23878_All	41.4234	6.0893	6.80265	3.86e-197	AP2/ERF domain-containing transcription factor [Populus trichocarpa]
	List of difference expression AP2/ERF family (> 2 fold or < 0.5, p<0.001) in M-SD /M-LD chrysanthemum plants
	unigene	M-SD /M-LD				Nr Annotation
		M-SD	M-LD	ratio	P-value	description
	Unigene23878_All	28.1227	5.7418	4.89789	3.48936e-107	AP2/ERF domain-containing transcription factor [Populus trichocarpa]
	List of difference expression MADS family (> 2 foldor < 0.5, p<0.001) in M-LD /WT-LD chrysanthemum plants
	unigene	M-LD /WT-LD				Nr Annotation
		M-LD	WT-LD	ratio	P-value	description
	Unigene47162_All	2.1279	0	#DIV/0!	5.74618e-06	AP2/ERF domain-containing transcription factor [Populus trichocarpa]
	Unigene46823_All	3.7168	0.9955	3.7336	4.5949e-05	AP2/ERF domain-containing transcription factor [Populus trichocarpa]

## Sheet: bHLH
	List of difference expression bHLH family (> 2 fold or < 0.5, p<0.001) in WT-SD /WT-LD chrysanthemum plants
	unigene	WT-SD /WT-LD				Nr Annotation
		WT-SD	WT-LD	ratio	P-value	description
	CL7546.Contig3_All	9.2388	1.5535	5.94709	2.9476e-62	putative bHLH transcription factor (bHLH062) [Arabidopsis thaliana]
	Unigene17628_All	0.0609	4.4557	0.0136679	2.76948e-40	PREDICTED: transcription factor bHLH128-like [Fragaria vesca subsp. vesca]
	CL11135.Contig2_All	0.1332	4.7985	0.0277587	5.04674e-37	PREDICTED: putative transcription factor bHLH041 [Vitis vinifera]
	CL11135.Contig1_All	0.1347	3.8236	0.0352286	1.89816e-28	PREDICTED: putative transcription factor bHLH041 [Vitis vinifera]
	Unigene44299_All	0.1089	2.26	0.0481858	8.89594e-06	PREDICTED: transcription factor bHLH157-like [Solanum lycopersicum]
	Unigene43333_All	0.2124	3.5948	0.0590853	1.79044e-08	PREDICTED: transcription factor bHLH128-like [Solanum lycopersicum]
	CL11431.Contig1_All	0.7303	5.0775	0.143831	1.25215e-21	PREDICTED: transcription factor bHLH47-like isoform 1 [Vitis vinifera]
	CL10403.Contig2_All	0.4704	2.7878	0.168735	4.231e-07	PREDICTED: transcription factor bHLH135-like [Solanum lycopersicum]
	Unigene12586_All	8.5047	38.023	0.223673	2.61604e-275	PREDICTED: transcription factor bHLH13 [Vitis vinifera]
	Unigene11229_All	6.4789	18.0505	0.358932	3.8611e-85	PREDICTED: transcription factor bHLH144 isoform 2 [Vitis vinifera]
	CL10561.Contig1_All	17.8338	47.9724	0.371751	2.55174e-216	PREDICTED: transcription factor bHLH130-like [Solanum lycopersicum]
	Unigene21449_All	7.8225	18.9331	0.413165	8.00178e-26	PREDICTED: transcription factor bHLH13 [Vitis vinifera]
	Unigene32634_All	7.2193	17.3312	0.416549	1.02567e-70	PREDICTED: transcription factor bHLH13 [Vitis vinifera]
	List of difference expression bHLH family (> 2 fold or < 0.5, p<0.001) in M-SD /M-LD chrysanthemum plants
	unigene	M-SD /M-LD				Nr Annotation
		M-SD	M-LD	ratio	P-value	description
	CL3634.Contig4_All	3.5987	1.2778	2.81632	1.01e-24	PREDICTED: transcription factor bHLH62-like [Vitis vinifera]
	Unigene19461_All	7.8207	2.9907	2.61501	1.81e-20	PREDICTED: transcription factor bHLH80-like isoform 1 [Solanum lycopersicum]
	Unigene36525_All	12.3012	6.013	2.04577	2.46e-21	PREDICTED: transcription factor bHLH121-like [Solanum lycopersicum]
	CL11135.Contig2_All	0.2072	5.1158	0.040502	8.96e-37	PREDICTED: putative transcription factor bHLH041 [Vitis vinifera]
	CL11135.Contig1_All	0.1747	4.2236	0.0413628	3.86e-30	PREDICTED: putative transcription factor bHLH041 [Vitis vinifera]
	Unigene12586_All	7.3868	30.0307	0.245975	1.96e-199	PREDICTED: transcription factor bHLH13 [Vitis vinifera]
	CL284.Contig4_All	0.708	1.8396	0.384866	0.000216504	PREDICTED: transcription factor bHLH113-like [Fragaria vesca subsp. vesca]
	CL10561.Contig1_All	21.6507	54.5579	0.396839	3.28e-221	PREDICTED: transcription factor bHLH130-like [Solanum lycopersicum]
	Unigene32634_All	8.193	19.8802	0.412119	3.03e-82	PREDICTED: transcription factor bHLH13 [Vitis vinifera]
	Unigene35681_All	1.9463	4.6143	0.421797	1.15e-05	PREDICTED: transcription factor bHLH62-like [Solanum lycopersicum]
	Unigene11229_All	6.7802	15.8603	0.427495	1.24e-56	PREDICTED: transcription factor bHLH144 isoform 2 [Vitis vinifera]
	CL11431.Contig1_All	4.9441	10.927	0.452466	3.17e-14	PREDICTED: transcription factor bHLH47-like isoform 1 [Vitis vinifera]
	Unigene21449_All	11.1629	23.7057	0.470895	4.52e-25	PREDICTED: transcription factor bHLH13 [Vitis vinifera]
	List of difference expression bHLH family (> 2 foldor < 0.5, p<0.001) in M-SD /WT-SD chrysanthemum plants
	unigene	M-SD /WT-SD				Nr Annotation
		M-SD	WT-SD	ratio	P-value	description
	CL11431.Contig1_All	4.9441	0.7303	6.76996	3.55132e-21	PREDICTED: transcription factor bHLH47-like isoform 1 [Vitis vinifera]
	CL3634.Contig3_All	0.3937	0.1026	3.83723	3.62258e-05	PREDICTED: transcription factor bHLH62-like [Vitis vinifera]
	List of difference expression bHLH family (> 2 foldor < 0.5, p<0.001) in M-LD /WT-LD chrysanthemum plants
	unigene	M-LD /WT-LD				Nr Annotation
		M-LD	WT-LD	ratio	P-value	description
	CL7546.Contig3_All	6.6387	1.5535	4.27338	3.96208e-35	putative bHLH transcription factor (bHLH062) [Arabidopsis thaliana]
	CL10561.Contig3_All	8.3598	3.3838	2.47054	7.90314e-24	PREDICTED: transcription factor bHLH130-like [Solanum lycopersicum]
	CL11431.Contig1_All	10.927	5.0775	2.15204	3.4162e-13	PREDICTED: transcription factor bHLH47-like isoform 1 [Vitis vinifera]
	Unigene44299_All	0.1139	2.26	0.0503982	1.377e-05	PREDICTED: transcription factor bHLH157-like [Solanum lycopersicum]
	Unigene43333_All	0.333	3.5948	0.0926338	2.19268e-07	PREDICTED: transcription factor bHLH128-like [Solanum lycopersicum]
	Unigene17628_All	0.5093	4.4557	0.114303	8.71268e-26	PREDICTED: transcription factor bHLH128-like [Fragaria vesca subsp. vesca]
	Unigene19461_All	2.9907	6.6554	0.449364	2.3329e-13	PREDICTED: transcription factor bHLH80-like isoform 1 [Solanum lycopersicum]

## Sheet: WRKY
	List of difference expression WRKY family (> 2 fold or < 0.5, p<0.001) in WT-SD /WT-LD chrysanthemum plants
	unigene	WT-SD /WT-LD				Nr Annotation
		WT-SD	WT-LD	ratio	P-value	description
	CL7800.Contig2_All	6.6459	1.0705	6.20822	5.33194e-27	WRKY transcription factor [Medicago truncatula]
	Unigene36433_All	3.3767	0.7153	4.72068	6.178e-17	WRKY transcription factor [Medicago truncatula]
	Unigene26338_All	3.4281	0.9981	3.43463	3.55966e-05	WRKY transcription factor 40 [Brassica napus]
	CL1027.Contig3_All	17.972	5.8824	3.05522	1.19698e-76	PREDICTED: probable WRKY transcription factor 33 [Glycine max]
	Unigene7984_All	6.5339	2.3701	2.7568	1.52227e-21	PREDICTED: probable WRKY transcription factor 53-like [Vitis vinifera]
	Unigene11458_All	2.9683	33.1725	0.0894807	0	WRKY transcription factor 1 [Artemisia annua]
	CL8575.Contig2_All	0.4983	4.0668	0.122529	7.19826e-30	WRKY transcription factor 1 [Artemisia annua]
	Unigene9423_All	0.5154	2.5945	0.198651	1.10519e-12	WRKY transcription factor 1 [Artemisia annua]
	CL8575.Contig1_All	0.4749	2.2295	0.213007	1.76704e-12	WRKY transcription factor 1 [Artemisia annua]
	CL12318.Contig2_All	7.4086	27.8191	0.266313	2.8115e-190	WRKY8, partial [Panax quinquefolius]
	CL431.Contig1_All	69.3408	182.577	0.37979	0	putative WRKY transcription factor 30 [Vitis aestivalis]
	Unigene15436_All	7.7435	17.6766	0.438065	1.41872e-38	WRKY22 [Catharanthus roseus]
	List of difference expression WRKY family (> 2 fold or < 0.5, p<0.001) in M-SD /M-LD chrysanthemum plants
	unigene	M-SD /M-LD				Nr Annotation
		M-SD	M-LD	ratio	P-value	description
	Unigene28367_All	2.2839	0.6903	3.30856	1.16e-05	PREDICTED: WRKY transcription factor 1-like [Glycine max]
	Unigene168_All	1.8946	0.6363	2.97753	3.77e-09	WRKY domain class transcription factor [Malus x domestica]
	Unigene8484_All	2.9749	1.2297	2.41921	1.13e-05	PREDICTED: probable WRKY transcription factor 21 [Vitis vinifera]
	Unigene27651_All	3.8064	1.6148	2.3572	1.89e-10	PREDICTED: probable WRKY transcription factor 20-like [Vitis vinifera]
	CL3693.Contig1_All	15.1918	6.643	2.28689	6.8e-29	PREDICTED: probable WRKY transcription factor 65 [Vitis vinifera]
	Unigene27897_All	251.42	118.932	2.11398	0	WRKY4 [Panax quinquefolius]
	Unigene11458_All	1.5227	128.342	0.0118644	0	WRKY transcription factor 1 [Artemisia annua]
	CL8575.Contig2_All	0.1969	16.4413	0.0119759	8.6e-186	WRKY transcription factor 1 [Artemisia annua]
	CL8575.Contig1_All	0.2217	8.9594	0.024745	3.74e-95	WRKY transcription factor 1 [Artemisia annua]
	Unigene9423_All	0.3267	7.8406	0.0416677	3.55e-64	WRKY transcription factor 1 [Artemisia annua]
	CL1027.Contig7_All	0.9656	22.6241	0.0426802	4e-306	WRKY 7 transcription factor, partial [Helianthus annuus]
	Unigene15436_All	5.3473	75.2376	0.0710722	0	WRKY22 [Catharanthus roseus]
	Unigene21923_All	0.1915	2.4122	0.0793881	2.77e-06	PREDICTED: probable WRKY transcription factor 70-like [Fragaria vesca subsp. vesca]
	CL1027.Contig5_All	0.2681	3.3674	0.0796163	1.62e-39	WRKY 7 transcription factor, partial [Helianthus annuus]
	CL10604.Contig1_All	0.2196	2.6548	0.0827181	5.18e-06	PREDICTED: TMV resistance protein N-like [Vitis vinifera]
	CL12318.Contig2_All	5.7348	62.2104	0.0921839	0	WRKY8, partial [Panax quinquefolius]
	Unigene27770_All	5.7539	60.6545	0.0948635	0	putative WRKY1a transcription factor [Coffea arabica]
	CL431.Contig1_All	49.0563	466.716	0.10511	0	putative WRKY transcription factor 30 [Vitis aestivalis]
	CL1027.Contig6_All	0.1892	1.4057	0.134595	4.72e-11	WRKY-like transcription factor [Solanum peruvianum]
	CL6576.Contig2_All	4.9388	35.2476	0.140117	2.87e-178	WRKY domain class transcription factor [Malus x domestica]
	CL11228.Contig2_All	1.0724	7.1048	0.15094	6.37e-35	WRKY10 [Panax quinquefolius]
	CL2067.Contig8_All	1.7781	11.0277	0.161239	1.59e-42	putative WRKY transcription factor 10 [Nicotiana tabacum]
	Unigene21079_All	0.6987	3.0797	0.226873	2.29e-05	PREDICTED: probable WRKY transcription factor 12-like [Fragaria vesca subsp. vesca]
	Unigene11918_All	57.9056	210.431	0.275176	0	WRKY transcription factor [Artemisia annua]
	CL7217.Contig2_All	1.5537	4.5845	0.338903	0.000210222	putative WRKY DNA-binding domain superfamily protein [Zea mays]
	CL7800.Contig2_All	0.9795	2.8468	0.344071	6.14e-07	WRKY transcription factor [Medicago truncatula]
	Unigene1929_All	4.7986	12.9181	0.371463	8.77e-13	PREDICTED: probable WRKY transcription factor 57 [Vitis vinifera]
	Unigene9306_All	1.0929	2.8416	0.384607	2.08e-06	transcription factor WRKY [Capsicum annuum]
	Unigene15066_All	2.218	4.5804	0.484237	1.58e-11	WRKY transcription factor [Picrorhiza kurrooa]
	List of difference expression WRKY family (> 2 fold or < 0.5, p<0.001) in M-SD /WT-SD chrysanthemum plants
	unigene	M-SD /M-LD				Nr Annotation
		M-SD	M-LD	ratio	P-value	description
	CL7800.Contig2_All	0.9795	6.6459	0.147384	2.92374e-29	WRKY transcription factor [Medicago truncatula]
	Unigene26338_All	0.6322	3.4281	0.184417	2.77268e-07	WRKY transcription factor 40 [Brassica napus]
	CL1027.Contig6_All	0.1892	0.7978	0.237152	4.26012e-05	WRKY-like transcription factor [Solanum peruvianum]
	CL1027.Contig7_All	0.9656	2.7417	0.35219	9.40206e-13	WRKY 7 transcription factor, partial [Helianthus annuus]
	CL2067.Contig8_All	1.7781	4.8756	0.364694	6.31644e-10	putative WRKY transcription factor 10 [Nicotiana tabacum]
	List of difference expression WRKY family (> 2 fold or < 0.5, p<0.001) in M-LD /WT-LD chrysanthemum plants
	unigene	M-LD /WT-LD				Nr Annotation
		M-LD	WT-LD	ratio	P-value	description
	Unigene36433_All	5.7153	0.7153	7.99007	3.68272e-37	WRKY transcription factor [Medicago truncatula]
	CL1027.Contig5_All	3.3674	0.5455	6.17305	3.13196e-28	WRKY 7 transcription factor, partial [Helianthus annuus]
	Unigene21923_All	2.4122	0.4032	5.98264	9.60676e-05	PREDICTED: probable WRKY transcription factor 70-like [Fragaria vesca subsp. vesca]
	CL6576.Contig2_All	35.2476	6.1975	5.68739	5.7396e-151	WRKY domain class transcription factor [Malus x domestica]
	Unigene27770_All	60.6545	12.1283	5.00107	0	putative WRKY1a transcription factor [Coffea arabica]
	CL1027.Contig7_All	22.6241	4.8041	4.70933	2.56712e-152	WRKY 7 transcription factor, partial [Helianthus annuus]
	CL1027.Contig6_All	1.4057	0.2986	4.70764	2.27822e-08	WRKY-like transcription factor [Solanum peruvianum]
	Unigene15436_All	75.2376	17.6766	4.25634	0	WRKY22 [Catharanthus roseus]
	CL8575.Contig2_All	16.4413	4.0668	4.04281	3.48278e-70	WRKY transcription factor 1 [Artemisia annua]
	CL8575.Contig1_All	8.9594	2.2295	4.01857	9.15894e-39	WRKY transcription factor 1 [Artemisia annua]
	Unigene11458_All	128.342	33.1725	3.86892	0	WRKY transcription factor 1 [Artemisia annua]
	CL11228.Contig2_All	7.1048	2.223	3.19604	4.69376e-19	WRKY10 [Panax quinquefolius]
	Unigene9423_All	7.8406	2.5945	3.02201	2.97382e-21	WRKY transcription factor 1 [Artemisia annua]
	CL7800.Contig2_All	2.8468	1.0705	2.65932	4.1993e-06	WRKY transcription factor [Medicago truncatula]
	CL1027.Contig3_All	15.3384	5.8824	2.60751	7.77242e-52	PREDICTED: probable WRKY transcription factor 33 [Glycine max]
	Unigene11918_All	210.431	81.8472	2.57102	0	WRKY transcription factor [Artemisia annua]
	CL431.Contig1_All	466.716	182.577	2.55627	0	putative WRKY transcription factor 30 [Vitis aestivalis]
	CL2067.Contig8_All	11.0277	4.4081	2.50169	2.66582e-17	putative WRKY transcription factor 10 [Nicotiana tabacum]
	CL12318.Contig2_All	62.2104	27.8191	2.23625	6.5211e-197	WRKY8, partial [Panax quinquefolius]
	CL7965.Contig2_All	14.6013	6.7439	2.16511	7.88322e-25	elicitor-induced DNA-binding protein homolog [Matricaria chamomilla]
	Unigene7942_All	1.4295	4.0272	0.354961	7.52284e-08	PREDICTED: probable WRKY transcription factor 65 [Vitis vinifera]
	Unigene186_All	0.7243	1.8159	0.398866	5.6802e-05	WRKY domain class transcription factor [Malus x domestica]

## Sheet: TCP
	List of difference expression MYB family (> 2 fold or < 0.5, p<0.001) in WT-SD /WT-LD chrysanthemum plants
	unigene	WT-SD /WT-LD				Nr Annotation
		WT-SD	WT-LD	ratio	P-value	description
	Unigene12522_All	6.7379	18.7543	2.7834	1.33876e-47	TCP domain class transcription factor [Malus x domestica]
	List of TCP family genes up-regulated (> 2 fold, p<0.001) in M-SD /M-LD chrysanthemum plants
	unigene	M-SD /M-LD				Nr Annotation
		M-SD	M-LD	ratio	P-value	description
	Unigene12522_All	28.5608	8.6747	3.29243	9.84e-90	TCP domain class transcription factor [Malus x domestica]
	Unigene35144_All	4.2114	1.7838	2.36091	9.88e-10	PREDICTED: transcription factor TCP15-like [Vitis vinifera]
	Unigene1087_All	30.2087	12.9002	2.34172	7.2e-101	PREDICTED: transcription factor TCP15-like [Vitis vinifera]
	Unigene12522_All	8.6747	28.5608	3.29243	9.84e-90	TCP domain class transcription factor [Malus x domestica]
	Unigene35144_All	1.7838	4.2114	2.36091	9.88e-10	PREDICTED: transcription factor TCP15-like [Vitis vinifera]
	Unigene1087_All	12.9002	30.2087	2.34172	7.2e-101	PREDICTED: transcription factor TCP15-like [Vitis vinifera]
	List of TCP family genes up-regulated (> 2 fold, p<0.001) in M-SD /WT-SD chrysanthemum plants
	unigene	M-SD /WT-SD				Nr Annotation
		M-SD	WT-SD	ratio	P-value	description
	Unigene35144_All	4.2114	2.0429	2.06148	6.9527e-08	PREDICTED: transcription factor TCP15-like [Vitis vinifera]
	List of difference expression TCP family (> 2 fold or < 0.5, p<0.001) in M-LD /WT-LD chrysanthemum plants
	unigene	M-LD /WT-LD				Nr Annotation
		M-LD	WT-LD	ratio	P-value	description
	Unigene19992_All	3.5992	1.7039	0.473411	2.4499e-05	PREDICTED: transcription factor TCP20-like [Vitis vinifera]
