# Supplementary material for: Gibberellic Acid Signaling Is Required to Induce Flowering of Chrysanthemum Grown under Both Short and Long Days
Source: Preprints.org preprint supplement (doi:10.20944/preprints201706.0015.v1), 2017-06-02
Supplement: Supplementary file 2 [file Table S1.xlsx]

## Sheet: Sheet1
Table S1. SRAP primer combinations used for genotyping ‘Jinba’ WT and M plants
	Paire	PriME-r Number	Squence
	#1	ME-1	TGAGTCCAAACCGGATA
		EM-5	GACTGCGTACGAATTAAC
	#2	ME-1	TGAGTCCAAACCGGATA
		EM-10	GACTGCGTACGAATTTAG
	#3	ME-3	TGAGTCCAAACCGGAAT
		EM-4	GACTGCGTACGAATTTGA
	#4	ME-3	TGAGTCCAAACCGGAAT
		EM-7	GACTGCGTACGAATTATG
	#5	ME-3	TGAGTCCAAACCGGAAT
		EM-16	GACTGCGTACGAATTCGG
	#6	ME-4	TGAGTCCAAACCGGACC
		EM-2	GACTGCGTACGAATTTGC
	#7	ME-4	TGAGTCCAAACCGGACC
		EM-7	GACTGCGTACGAATTATG
	#8	ME-6	TGAGTCCAAACCGGTAG
		EM-7	GACTGCGTACGAATTATG
	#9	ME-6	TGAGTCCAAACCGGTAG
		EM-10	GACTGCGTACGAATTTAG
	#10	ME-6	TGAGTCCAAACCGGTAG
		EM-14	GACTGCGTACGAATTCAG
	#11	ME-6	TGAGTCCAAACCGGTAG
		EM-15	GACTGCGTACGAATTCTG
	#12	ME-8	TGAGTCCAAACCGGTGT
		EM-2	GACTGCGTACGAATTTGC
	#13	ME-8	TGAGTCCAAACCGGTGT
		EM-4	GACTGCGTACGAATTTGA
	#14	ME-8	TGAGTCCAAACCGGTGT
		EM-7	GACTGCGTACGAATTATG
	#15	ME-8	TGAGTCCAAACCGGTGT
		EM-16	GACTGCGTACGAATTCGG
	#16	ME-8	TGAGTCCAAACCGGTGT
		EM-18	GACTGCGTACGAATTGAT
	#17	ME-10	TGAGTCCAAACCGGATG
		EM-8	GACTGCGTACGAATTAGC
	#18	ME-16	TGAGTCCAAACCGGAGG
		EM-7	GACTGCGTACGAATTATG
	#19	ME-16	TGAGTCCAAACCGGAGG
		EM-9	GACTGCGTACGAATTACG
	#20	ME-16	TGAGTCCAAACCGGAGG
		EM-10	GACTGCGTACGAATTTAG
	#21	ME-16	TGAGTCCAAACCGGAGG
		EM-15	GACTGCGTACGAATTCTG
	#22	ME-16	TGAGTCCAAACCGGAGG
		EM-18	GACTGCGTACGAATTGAT
	#23	ME-19	CAAATGTGAACCGGATA
		EM-14	GACTGCGTACGAATTCAG
	#24	ME-21	GTACATAGAACCGGAGT
		EM-8	GACTGCGTACGAATTAGC
	#25	ME-21	GTACATAGAACCGGAGT
		EM-17	GACTGCGTACGAATTCCA
	#26	ME-24	GACCAGTAAACCGGATG
		EM-17	GACTGCGTACGAATTCCA
	#27	ME-23	CACAGTCATGCCGGAAT
		EM-10	GACTGCGTACGAATTTAG
	#28	ME-25	CAGGACTAAACCGGATA
		EM-2	GACTGCGTACGAATTTGC
	#29	ME-20	GAGTATCAACCCGGATT
		EM-14	GACTGCGTACGAATTCAG
	#30	ME-1	TGAGTCCAAACCGGATA
		EM-3	GACTGCGTACGAATTGAC
	#31	ME-1	TGAGTCCAAACCGGATA
		EM-14	GACTGCGTACGAATTCAG
	#32	ME-1	TGAGTCCAAACCGGATA
		EM-15	GACTGCGTACGAATTCTG
	#33	ME-1	TGAGTCCAAACCGGATA
		EM-16	GACTGCGTACGAATTCGG
	#34	ME-1	TGAGTCCAAACCGGATA
		EM-18	GACTGCGTACGAATTGAT
	#35	ME-3	TGAGTCCAAACCGGAAT
		EM-3	GACTGCGTACGAATTGAC
	#36	ME-3	TGAGTCCAAACCGGAAT
		EM-5	GACTGCGTACGAATTAAC
