# Supplementary material for: Gibberellic Acid Signaling Is Required to Induce Flowering of Chrysanthemum Grown under Both Short and Long Days
Source: Preprints.org preprint supplement (doi:10.20944/preprints201706.0015.v1), 2017-06-02
Supplement: Supplementary file 3 [file Table S2.xlsx]

## Sheet: Sheet1
Table S2. List of assembled transcripts up-regulated or down-regulated (> or < 2.0 fold) in WT and M chrysanthemum plant under SD and LD.
Gene ID	M-SD /WT-SD					WT-SD /WT-LD					M-SD/M-LD					M-LD /WT-LD					Annotation
	M-SD	WT-SD	ratio	p value	FDR	WT-SD	WT-LD	ratio	p value	FDR	M-SD	M-LD	ratio	p value	FDR	M-LD	WT-LD	ratio	p value	FDR
Photoperiod pathway
CL80.Contig1_All	3.51	2.64	1.33	0.0440468	0.132785	2.64	1.3	2.04	0.000116254	0.000785233	3.51	1.5	2.36	2.05e-07	1.66e-06	1.5	1.3	1.15	0.521062	0.664549	Chrysanthemum seticuspe f.boreale CsTOC1 mRNA for timing of cab expression 1-like
CL6838.Contig1_All	52.36	36.32	1.44	1.78776e-45	1.97703e-43	36.32	33.3	1.09	0.00302688	0.0137251	52.36	26.07	2.01	4.2e-133	4.27e-131	26.07	33.3	0.78	3.06658e-14	7.07828e-13	Two-component response regulator-like APRR5
CL64.Contig1_All	4.2	3.25	1.29	0.0204146	0.0739925	3.25	2.35	1.38	0.0137732	0.0480794	4.2	1.65	2.54	2.18e-12	2.9e-11	1.65	2.35	0.7	0.022237	0.0665425	Protein LHY
CL64.Contig2_All	6.34	4.57	1.39	0.000415992	0.00309008	4.57	3.29	1.39	0.00292826	0.0133856	6.34	2.3	2.76	7.09e-20	1.44e-18	2.3	3.29	0.7	0.00685756	0.0259301	Protein LHY
Unigene30909_All	5.06	3.74	1.35	0.0025788	0.0144652	3.74	1.97	1.9	7.4e-07	7.29e-06	5.06	2.43	2.09	8.40758e-11	9.85431e-10	2.43	1.97	1.23	0.153789	0.290938	Chrysanthemum seticuspe f. boreale CsLHY mRNA for late elongated hypocotyl-like
CL7048.Contig2_All	14.99	10.17	1.47	2.25284e-09	4.60682e-08	10.17	9.32	1.09	0.141491	0.286103	14.99	6.42	2.33	1.96129e-36	6.72181e-35	6.42	9.32	0.69	1.63981e-07	1.99745e-06	Zinc finger protein CONSTANS-LIKE 9
CL10258.Contig3_All	54.6	41.44	1.38	6.74902e-19	3.04177e-17	41.44	23.72	1.68	1.39e-29	4.4e-28	54.6	13.61	3.74	1.97825e-170	2.4495e-168	13.61	23.72	0.62	9.36646e-16	2.35446e-14	Zinc finger protein CONSTANS-LIKE 16
Unigene16657_All	100.21	93.59	1.07	0.00050699	0.0036794	93.59	77.41	1.21	3.97e-19	8.99e-18	100.21	43.79	2.29	1.32237e-260	2.33648e-258	43.79	77.41	0.57	3.5077e-107	5.16071e-105	Zinc finger protein CONSTANS-LIKE 16
GA biosynthesis and signaling
CL2973.Contig1_All	30.22	38.62	0.78	5.79962e-14	1.85327e-12	38.62	7.74	4.99	6.06e-261	1.35e-258	30.22	18.62	1.62	1.98727e-34	6.51732e-33	18.62	7.74	2.41	1.38385e-54	1.08507e-52	gibberellin 20-oxidase2 [Chrysanthemum x morifolium]
CL8331.Contig2_All	0.2	0.14	1.38	0.557804	0.717681	0.14	3.94	0.04	1.58e-40	6.6e-39	0.2	0.92	0.21	8.24258e-06	5.12018e-05	0.92	3.94	0.23	7.27598e-19	2.14297e-17	Gibberellin 2-beta-dioxygenase 1
Unigene27395_All	2.36	3.36	0.7	0.0120762	0.0497427	3.36	3.19	1.05	0.70539	0.812883	2.36	8.18	0.29	5.44502e-28	1.49129e-26	8.18	3.19	2.56	1.21565e-18	3.52737e-17	Gibberellin receptor GID1
Unigene27748_All	12.22	14.43	0.85	0.00108689	0.00706744	14.43	45.74	0.32	2.05e-214	3.85e-212	12.22	23.59	0.52	2.25646e-47	9.59448e-46	23.59	45.74	0.5	5.86364e-89	7.21542e-87	DELLA protein GAI
Flowering integrators
CL1484.Contig1_All	0.41	0.39	0.93	0.88891	0.950819	0.39	12.17	0.03	6.24e-72	4.3e-70	0.41	12.12	0.03	3.4654e-72	2.11083e-70	12.12	12.17	1	0.967356	0.974926	flowering locus T-Like 1 protein [Chrysanthemum x morifolium]
CL1484.Contig2_All	31.81	16.88	1.88	5.5053e-51	6.94279e-49	16.88	1.68	3.94	4.9e-148	6.5e-146	31.81	2.08	15.32	0	0	2.08	1.68	1.23	0.168787	0.310143	flowering locus T-Like 3 protein [Chrysanthemum x morifolium]
Unigene40592_All	17.65	8.68	2.03	2.30034e-21	1.17294e-19	8.68	3.6	2.41	9.2e-15	1.69e-13	17.65	16.82	1.05	0.45471	0.575668	16.82	3.6	4.67	4.76388e-57	3.89788e-55	MADS-box protein SOC1
Unigene25380_All	0.57	0.75	0.76	0.33433	0.524082	0.75	1.28	0.58	0.0204438	0.0662557	0.57	8.5	0.07	1.24401e-71	7.53371e-70	8.5	1.28	6.66	2.32236e-50	1.68077e-48	Chrysanthemum x morifolium FLO/LFY-like protein gene
Unigene23898_All	76.84	47.87	1.61	1.42676e-56	2.02693e-54	47.87	1.54	31.12	0	0	76.84	2.03	37.89	0	0	2.03	1.54	1.32	0.125604	0.249386	APETALA1 and FRUITFULL like protein [Chrysanthemum seticuspe f. boreale]
Aging, ambient temperature and autonomous pathway
Unigene29044_All	0.4	1.3	0.33	0.00241038	0.0136315	1.3	9.51	0.14	1.94e-33	6.92e-32	0.4	7.11	0.06	1.6493e-33	0.0301588	7.11	9.51	0.75	0.00819436	0.0301588	Squamosa promoter-binding-like protein 5
CL14613.Contig14_All	2.96	1.01	2.93	1.17937e-07	1.91285e-06	1.01	1.59	0.63	0.0564736	0.144482	2.96	1.6	1.85	0.000798018	0.993574	1.6	1.59	1	0.991756	0.993574	FLC-like
CL8773.Contig1_All	1.7	1.03	1.92	3.95452e-05	0.000393994	1.03	0.89	0.86	0.39634	0.568018	1.7	0.63	2.7	1.24838e-08	0.0436789	0.63	0.89	0.61	0.0129606	0.0436789	Protein FRIGIDA
Unigene20776_All	23.5	42.08	0.56	2.07634e-45	2.29348e-43	42.08	308.77	0.14	0	0	23.5	167.5	0.14	0	0	167.5	308.77	0.54	0	0	MADS-box protein SVP
The bold repreats those genes are not differentially expressed and P>0.001.
