# Supplementary material for: Gibberellic Acid Signaling Is Required to Induce Flowering of Chrysanthemum Grown under Both Short and Long Days
Source: Preprints.org preprint supplement (doi:10.20944/preprints201706.0015.v1), 2017-06-02
Supplement: Supplementary file 5 [file Table S4.xlsx]

## Sheet: Sheet1
Table S4. qRT-PCR primer combinations used for quantifying the transcription of WT and M plants.
	Gene	Annotation	Squence
	CL7048.Contig2_All	COL	ATCCGCTCTTGCCTTTCGT
			TTCGTCTATGCTTCTAATGGGTG
	CL10258.Contig3_All	COL	GGCGGTGAGGGTTTGTCTA
			GTGCTCGGTGGTATTGTGCT
	Unigene16657_All	COL	TGTTTGTTTCTGGAACGAGGG
			GTGGTATTGTGCCGCTGATG
	Unigene40592_All	SOC1	CCATGTCCAGAAGATGTCCA
			AGCCAACTGCCTCATATGCT
	CL1484.Contig1_All	FTL1	AATCGTGTGCTATGAGAGCC
			GCTTGTAACGTCCTCTTCATGC
	CL1484.Contig2_All	FTL3	CTATGAGAGCCCAAGGCCATCAATG
			TGATGTTCGTGCTTTCAATATGTAT
	Unigene23898_All	AP1/FUL	CGGGTGACGTTGAAAAGAAT
			GCATGTTCCAAAGTCCACCT
	Unigene25380_All	LFY	AGGCCTTTGCAAGAGGAAAT
			TGAAAGCAGCAATGGATCAG
	CL2973.Contig1_All	GA20ox	TTGCTTACATCGAGCTGTGG
			CATATCGGCTCGGTAATGCT
	CL8331.Contig2_All	GA2ox	AACCATGGAGTCCCATTTGA
			CTGAGCCAAGGGCAATAGAG
	Unigene27395_All	GID1	ATGGGCTTGACTTTGTTC
			CTCGGTCATTACACCTTTCAG
	Unigene27748_All	GAI	CCAATGCCTGTCAGCCTTAA
			CCGCAAAATGGTGTAGTTCAA
